# Supplementary material
Source: PubMed Central journal article supplement (PMC3922201)

(A) Morphine

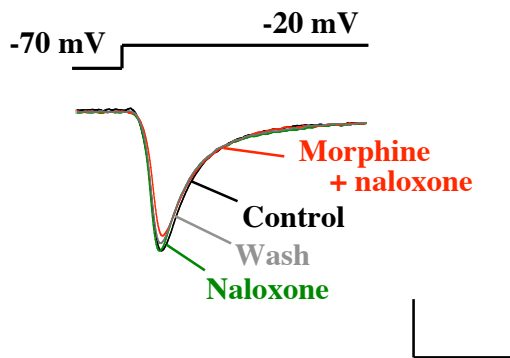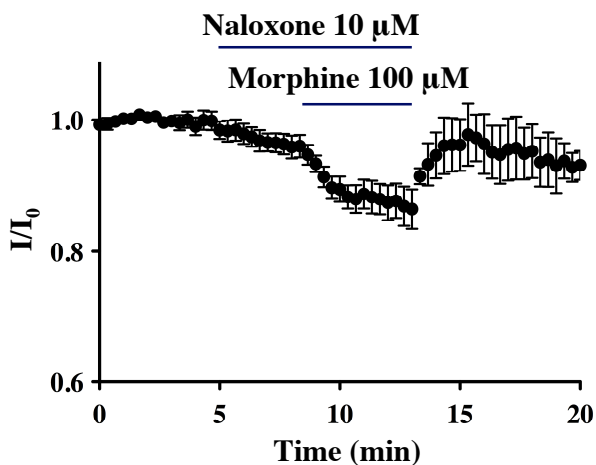

(B) Fentanyl

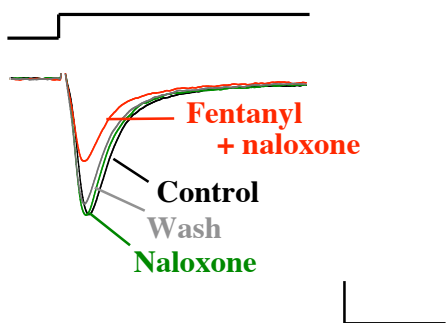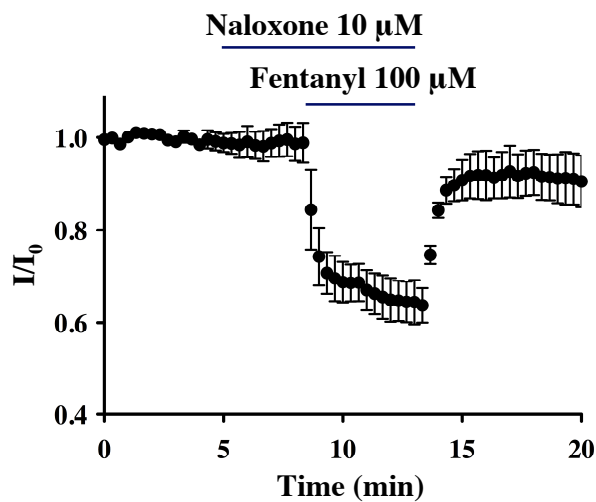

(C) Oxycodone

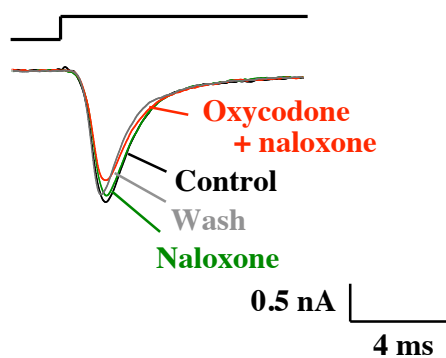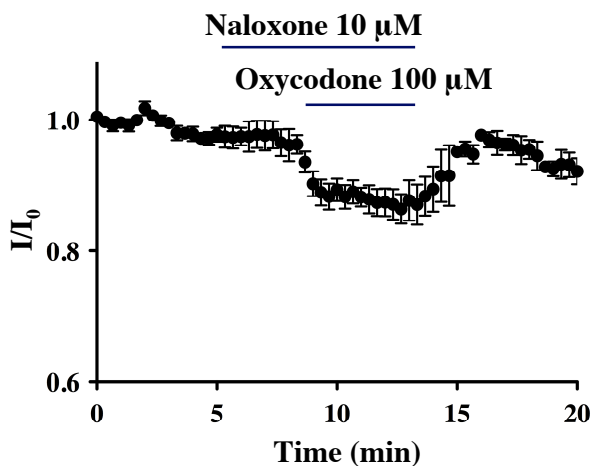

Supplement: NIHMS316364-supplement-Supplementary_figure_1.pdf [file NIHMS316364-supplement-Supplementary_figure_1.pdf]

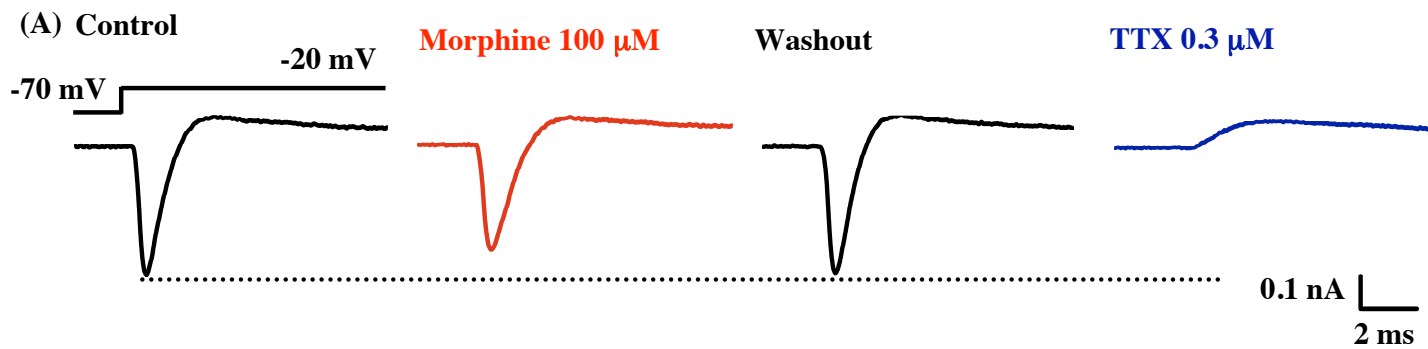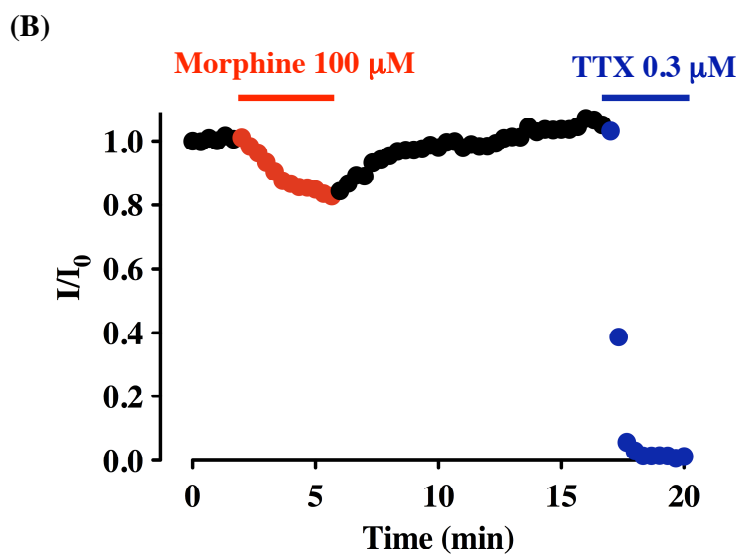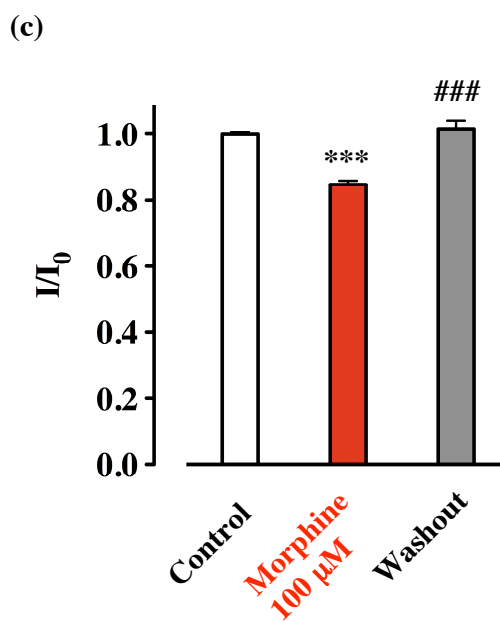

Supplement: NIHMS316364-supplement-Supplementary_figure_2.pdf [file NIHMS316364-supplement-Supplementary_figure_2.pdf]
